# Supplementary material for: Physiological responses of the scleractinian coral Pocillopora damicornis to bacterial stress from Vibrio coralliilyticus
Source: Oxford University Press journal article supplement (doi:10.1242/jeb.053165), 2011-04-13
Supplement: jeb053165tables1.pdf [file jeb053165tables1.pdf]

Table S1. Cluster number, annotation, top BLASTX, top BLAST with functional similarity, functional classification and GenBank accession numbers of the annotated expressed sequence tags for the BI, BR, TBI and TBR libraries

| Library cluster no. | Annotation                                                   | Top BLASTX protein [species]                                                          | <i>E</i>            | Top BLAST functional similarity protein [species]                                                | <i>E</i>            | Functional classification  | GenBank accession no. |
|---------------------|--------------------------------------------------------------|---------------------------------------------------------------------------------------|---------------------|--------------------------------------------------------------------------------------------------|---------------------|----------------------------|-----------------------|
| B-I-146             | Putative spore formation protein K                           | spore formation protein K [Bacillus clausii KSM-K16]                                  | 8.10 <sup>-20</sup> |                                                                                                  |                     | Cellular metabolic process | HO112242              |
| B-I-147             | Actin                                                        | actin [Stylophora pistillata]                                                         | 3.10 <sup>-74</sup> |                                                                                                  |                     | Cytoskeleton organization  | HO112243              |
| B-I-148             | Arylsulfatase                                                | predicted protein [Nematostella vectensis]                                            | 1.10 <sup>-12</sup> | similar to arylsulfatase J [Gallus gallus]                                                       | 1.10 <sup>-9</sup>  | Cellular metabolic process | HO112244              |
| B-I-149             | ATP-dependent RNA helicase, eIF4A related                    | ATP-dependent RNA helicase, eIF4A related [Schizosaccharomyces pombe 972h-]           | 6.10 <sup>-4</sup>  |                                                                                                  |                     | RNA metabolic process      | HO112245              |
| B-I-150             | Carbonic anhydrase                                           | carbonic anhydrase [Desulfovibrio vulgaris str. 'Miyazaki F']                         | 2.10 <sup>-4</sup>  |                                                                                                  |                     | Response to stress         | HO112247              |
| B-I-151             | CCAAT/Enhancer binding protein beta                          | predicted protein [Nematostella vectensis]                                            | 6.10 <sup>-20</sup> | CCAAT/Enhancer binding protein beta [Paralichthys olivaceus]                                     | 1.10 <sup>-19</sup> | Immune response            | HO112248              |
| B-I-153             | DEAH (Asp-Glu-Ala-His) box polypeptide 15                    | DEAH (Asp-Glu-Ala-His) box polypeptide 15 [Hydra magnipapillata]                      | 4.10 <sup>-4</sup>  |                                                                                                  |                     | Response to stress         | HO112250              |
| B-I-156             | Proline-rich transmembrane protein 1                         | hypothetical protein BRAFLDRAFT_74660 [Branchiostoma floridae]                        | 7.10 <sup>-14</sup> | proline-rich transmembrane protein 1 [Porphyromonas endodontalis ATCC 35406]                     | 5.10 <sup>-7</sup>  | Immune response            | HO112253              |
| B-I-159             | Epsilon subunit of ATP synthetase                            | hypothetical protein [Strongylocentrotus purpuratus]                                  | 4.10 <sup>-8</sup>  | epsilon subunit of ATP synthetase [Hydroides elegans]                                            | 2.10 <sup>-6</sup>  | Cellular metabolic process | HO112256              |
| B-I-160             | Putative lysyl-tRNA synthetase                               | lysyl-tRNA synthetase, putative [Perkinsus marinus ATCC 50983]                        | 7.10 <sup>-19</sup> |                                                                                                  |                     | Protein metabolic process  | HO112258              |
| B-I-161             | Antho-RFamide neuropeptides                                  | Antho-RFamide Precursor [Calliactis parasitica]                                       | 6.10 <sup>-41</sup> |                                                                                                  |                     | Signal transduction        | HO112259              |
| B-I-162             | NOD3 protein                                                 | predicted protein [Nematostella vectensis]                                            | 2.10 <sup>-30</sup> | NOD3 protein, isoform CRA_d [Homo sapiens]                                                       | 1.10 <sup>-29</sup> | Immune response            | HO112260              |
| B-I-163             | 60S ribosomal protein L22                                    | predicted protein [Nematostella vectensis]                                            | 9.10 <sup>-24</sup> | 60S ribosomal protein L22, putative [Pediculus humanus corporis]                                 | 3.10 <sup>-21</sup> | Protein metabolic process  | HO112261              |
| B-I-164             | 60S ribosomal protein, Rpl7A                                 | predicted protein [Nematostella vectensis]                                            | 2.10 <sup>-25</sup> | 60S ribosomal protein, Rpl7A [Seculamonas ecuadoriensis]                                         | 1.10 <sup>-24</sup> | Protein metabolic process  | HO112262              |
| B-I-165             | Ribosomal protein S10                                        | predicted protein [Nematostella vectensis]                                            | 2.10 <sup>-17</sup> | ribosomal protein S10 [Crassostrea gigas]                                                        | 1.10 <sup>-8</sup>  | Protein metabolic process  | HO112263              |
| B-I-166             | Ribosomal protein S19                                        | predicted protein [Nematostella vectensis]                                            | 1.10 <sup>-15</sup> | ribosomal protein S19, isoform CRA_b [Homo sapiens]                                              | 3.10 <sup>-14</sup> | Protein metabolic process  | HO112264              |
| B-I-167             | Similar to Zinc finger RNA-binding protein                   | similar to Zinc finger RNA-binding protein [Bos taurus]                               | 1.10 <sup>-7</sup>  |                                                                                                  |                     | RNA metabolic process      | HO112265              |
| B-I-168             | Peridinin chlorophyll-a binding protein apoprotein precursor | peridinin chlorophyll-a binding protein apoprotein precursor [Symbiodinium kawagutii] | 1.10 <sup>-15</sup> |                                                                                                  |                     | Photosynthetic process     | HO112266              |
| B-I-169             | Peroxiredoxin 6                                              | predicted protein [Nematostella vectensis]                                            | 1.10 <sup>-43</sup> | peroxiredoxin 6 [Haliotis discus discus]                                                         | 1.10 <sup>-41</sup> | Response to stress         | HO112267              |
| B-I-170             | Symbiot Polyubiquitin                                        | polyubiquitin [Symbiodinium sp. C3]                                                   | 7.10 <sup>-24</sup> |                                                                                                  |                     | Protein metabolic process  | HO112269              |
| B-I-172             | similar to Solute carrier family 30                          | predicted protein [Nematostella vectensis]                                            | 5.10 <sup>-20</sup> | similar to Solute carrier family 30 (zinc transporter), member 5 [Strongylocentrotus purpuratus] | 6.10 <sup>-11</sup> | Cellular homeostasis       | HO112271              |
| B-I-173             | Ornithine decarboxylase antizyme 2                           | predicted protein [Nematostella vectensis]                                            | 2.10 <sup>-14</sup> | ornithine decarboxylase antizyme 2 [Danio rerio]                                                 | 2.10 <sup>-8</sup>  | Cellular metabolic process | HO112272              |
| B-I-174             | Peptidyl-dipeptidase A                                       | predicted protein [Nematostella vectensis]                                            | 2.10 <sup>-9</sup>  | peptidyl-dipeptidase A [Acidobacteria bacterium Ellin345]                                        | 7.10 <sup>-8</sup>  | Response to stress         | HO112273              |

|         |                                                              |                                                                                              |                      |                                                                                |                     |                                 |          |
|---------|--------------------------------------------------------------|----------------------------------------------------------------------------------------------|----------------------|--------------------------------------------------------------------------------|---------------------|---------------------------------|----------|
| B-I-175 | Similar to placenta-specific 8                               | predicted protein [Nematostella vectensis]                                                   | 1.10 <sup>-20</sup>  | PREDICTED: similar to placenta-specific 8 [Ciona intestinalis]                 | 8.10 <sup>-7</sup>  | Immune response                 | HO112274 |
| B-I-176 | Putative Sec61 protein translocation complex beta-subunit    | hypothetical protein BRAFLDRAFT_284448 [Branchiostoma floridae]                              | 1.10 <sup>-12</sup>  | Sec61 protein translocation complex beta-subunit, putative [Ixodes scapularis] | 1.10 <sup>-10</sup> | Intracellular protein transport | HO112275 |
| B-I-177 | Similar to Pema-SRCR protein                                 | predicted protein [Nematostella vectensis]                                                   | 1.10 <sup>-6</sup>   | PREDICTED: similar to Pema-SRCR protein [Strongylocentrotus purpuratus]        | 5.10 <sup>-5</sup>  | Immune response                 | HO112276 |
| B-I-181 | Similar to 40S ribosomal protein S2                          | PREDICTED: similar to 40S ribosomal protein S2 [Gallus gallus]                               | 7.10 <sup>-24</sup>  |                                                                                |                     | Protein metabolic process       | HO112281 |
| B-I-182 | Ribosomal protein L11                                        | ribosomal protein L11 [Lysiphlebus testaceipes]                                              | 5.10 <sup>-78</sup>  |                                                                                |                     | Protein metabolic process       | HO112282 |
| B-I-183 | 60S ribosomal protein L40A                                   | 60S ribosomal protein L40A [Lycosa singoriensis]                                             | 4.10 <sup>-21</sup>  |                                                                                |                     | Protein metabolic process       | HO112283 |
| B-I-184 | Ribosomal protein rps12                                      | ribosomal protein rps12 [Eurythoe complanata]                                                | 3.10 <sup>-61</sup>  |                                                                                |                     | Protein metabolic process       | HO112284 |
| B-I-185 | Putative 60S ribosomal protein RPL10                         | predicted protein [Nematostella vectensis]                                                   | 5.10 <sup>-103</sup> | putative 60S ribosomal protein RPL10 [Phoronis muelleri]                       | 1.10 <sup>-98</sup> | Protein metabolic process       | HO112285 |
| B-I-186 | Serotransferrin                                              | serotransferrin [Gillichthys mirabilis]                                                      | 1.10 <sup>-4</sup>   |                                                                                |                     | System development              | HO112286 |
| B-I-188 | small heat shock protein                                     | small heat shock protein [uncultured cnidarian]                                              | 6.10 <sup>-10</sup>  |                                                                                |                     | Response to stress              | HO112288 |
| B-I-190 | Selenium binding protein 1                                   | selenium binding protein 1 [Mus musculus]                                                    | 4.10 <sup>-30</sup>  |                                                                                |                     | Immune response                 | HO112291 |
|         |                                                              |                                                                                              |                      |                                                                                |                     |                                 |          |
| B-R-160 | Adaptor complexes medium subunit                             | adaptor complexes medium subunit Domain containing protein, putative [Toxoplasma gondii VEG] | 1.10 <sup>-9</sup>   |                                                                                |                     | Protein metabolic process       | HO112447 |
| B-R-161 | Beta-tubulin                                                 | beta-tubulin [Pythium sp. quercum]                                                           | 1.10 <sup>-16</sup>  |                                                                                |                     | Cytoskeleton organization       | HO112448 |
| B-R-162 | Chloroplast phosphoglycerate kinase precursor                | chloroplast phosphoglycerate kinase precursor [Euglena gracilis]                             | 2.10 <sup>-33</sup>  |                                                                                |                     | Cellular metabolic process      | HO112449 |
| B-R-163 | Cystathionine beta-lyase                                     | cystathionine beta-lyase [Flavobacteriales bacterium HTCC2170]                               | 9.10 <sup>-6</sup>   |                                                                                |                     | Apoptosis                       | HO112450 |
| B-R-164 | Cystatin B                                                   | predicted protein [Nematostella vectensis]                                                   | 7.10 <sup>-8</sup>   | cystatin B [Danio rerio]                                                       | 7.10 <sup>-8</sup>  | Immune response                 | HO112451 |
| B-R-166 | Myeloid differentiation response protein 88                  | hypothetical protein BRAFLDRAFT_81544 [Branchiostoma floridae]                               | 5.10 <sup>-6</sup>   | myeloid differentiation response protein 88 [Ctalarus punctatus]               | 2.10 <sup>-4</sup>  | Signal transduction             | HO112453 |
| B-R-169 | Putative krp3                                                | krp3, putative [Perkinsus marinus ATCC 50983]                                                | 3.10 <sup>-4</sup>   |                                                                                |                     | Cellular metabolic process      | HO112456 |
| B-R-170 | major basic nuclear protein                                  | major basic nuclear protein [Karlodinium micrum]                                             | 1.10 <sup>-13</sup>  |                                                                                |                     | Chromatin remodelling           | HO112458 |
| B-R-171 | major basic nuclear protein                                  | major basic nuclear protein [Karlodinium micrum]                                             | 8.10 <sup>-7</sup>   |                                                                                |                     | Chromatin remodelling           | HO112459 |
| B-R-172 | Mitochondrial phosphate carrier                              | predicted protein [Physcomitrella patens subsp. patens]                                      | 2.10 <sup>-9</sup>   | mitochondrial phosphate carrier [Saccharomyces cerevisiae YJM789]              | 9.10 <sup>-6</sup>  | Cellular metabolic process      | HO112460 |
| B-R-173 | Peridinin chlorophyll-a binding protein apoprotein precursor | peridinin chlorophyll-a binding protein apoprotein precursor [Symbiodinium kawagutii]        | 1.10 <sup>-16</sup>  |                                                                                |                     | Photosynthetic process          | HO112461 |
| B-R-174 | 1-cys peroxiredoxin                                          | GA15914 [Drosophila pseudoobscura pseudoobscura]                                             | 9.10 <sup>-18</sup>  | 1-cys peroxiredoxin DPx-6005 [Drosophila melanogaster]                         | 1.10 <sup>-16</sup> | Response to stress              | HO112462 |
| B-R-176 | Trypsin                                                      | predicted protein [Nematostella vectensis]                                                   | 8.10 <sup>-30</sup>  | trypsin [Marsupenaeus japonicus]                                               | 1.10 <sup>-13</sup> | Cellular metabolic process      | HO112464 |
| B-R-177 | Peptidyl-dipeptidase A                                       | hypothetical protein BRAFLDRAFT_129715 [Branchiostoma floridae]                              | 3.10 <sup>-8</sup>   | peptidyl-dipeptidase A [Acidobacteria bacterium Ellin345]                      | 1.10 <sup>-6</sup>  | Response to stress              | HO112465 |

|          |                                                                 |                                                                                                     |                     |                                                                                                                           |                     |                                 |          |
|----------|-----------------------------------------------------------------|-----------------------------------------------------------------------------------------------------|---------------------|---------------------------------------------------------------------------------------------------------------------------|---------------------|---------------------------------|----------|
| B-R-180  | Transcriptional adaptor 2                                       | predicted protein [Nematostella vectensis]                                                          | 2.10 <sup>-40</sup> | transcriptional adaptor 2 [Mus musculus]                                                                                  | 8.10 <sup>-16</sup> | Protein metabolic process       | HO112469 |
| B-R-181  | 2-oxoglutarate dehydrogenase                                    | predicted protein [Nematostella vectensis]                                                          | 4.10 <sup>-17</sup> | 2-oxoglutarate dehydrogenase (lipoamide) (e1 component of oxoglutarate dehydrogenase complex) [Schizosaccharomyces pombe] | 1.10 <sup>-11</sup> | Cellular metabolic process      | HO112470 |
| B-R-183  | Similar to damage specific DNA binding protein 1                | predicted protein [Nematostella vectensis]                                                          | 4.10 <sup>-13</sup> | similar to damage specific DNA binding protein 1 [Strongylocentrotus purpuratus]                                          | 8.10 <sup>-5</sup>  | Response to stress              | HO112472 |
| B-R-184  | Ribosomal protein S26                                           | predicted protein [Nematostella vectensis]                                                          | 3.10 <sup>-15</sup> | ribosomal protein S26 [Branchiostoma belcheri]                                                                            | 7.10 <sup>-13</sup> | Protein metabolic process       | HO112473 |
| B-R-185  | Putative zinc finger protein                                    | PREDICTED: similar to MGC83605 protein [Hydra magnipapillata]                                       | 7.10 <sup>-8</sup>  | putative zinc finger protein [Euprymna scolopes]                                                                          | 6.10 <sup>-5</sup>  | RNA metabolic process           | HO112474 |
| B-R-188  | 60S ribosomal protein L4                                        | predicted protein [Nematostella vectensis]                                                          | 8.10 <sup>-47</sup> | 60S ribosomal protein L4 [Chlamydomonas sp. HS-5]                                                                         | 9.10 <sup>-35</sup> | Protein metabolic process       | HO112476 |
| B-R-189  | Putative ribosomal protein S21                                  | putative ribosomal protein S21 [Barentsia elongata]                                                 | 5.10 <sup>-7</sup>  |                                                                                                                           |                     | Protein metabolic process       | HO112477 |
| B-R-190  | Similar to Rab10 isoform 2                                      | predicted protein [Nematostella vectensis]                                                          | 7.10 <sup>-64</sup> | PREDICTED: similar to Rab10 isoform 2 [Pan troglodytes]                                                                   | 1.10 <sup>-49</sup> | Intracellular protein transport | HO112479 |
| B-R-191  | RNA-binding protein                                             | RNA-binding protein [Karlodinium micrum]                                                            | 3.10 <sup>-13</sup> |                                                                                                                           |                     | RNA metabolic process           | HO112480 |
| B-R-194  | Thioredoxin domain containing 16                                | PREDICTED: thioredoxin domain containing 16 [Taeniopygia guttata]                                   | 1.10 <sup>-3</sup>  |                                                                                                                           |                     | Response to stress              | HO112482 |
| B-R-195  | Ubiquitin-conjugating enzyme e2-16kda, ubiquitin protein ligase | ubiquitin-conjugating enzyme e2-16kda, ubiquitin protein ligase [Thalassiosira pseudonana CCMP1335] | 3.10 <sup>-29</sup> |                                                                                                                           |                     | Protein metabolic process       | HO112483 |
|          |                                                                 |                                                                                                     |                     |                                                                                                                           |                     |                                 |          |
| TB-I-172 | 60S acidic ribosomal phosphoprotein P0                          | 60S acidic ribosomal phosphoprotein P0 [Stylophora pistillata]                                      | 3.10 <sup>-53</sup> |                                                                                                                           |                     | Protein metabolic process       | HO112666 |
| TB-I-173 | Nascent polypeptide-associated complex alpha subunit            | nascent polypeptide-associated complex alpha subunit [Pongo abelii]                                 | 9.10 <sup>-44</sup> |                                                                                                                           |                     | Protein metabolic process       | HO112667 |
| TB-I-175 | Calmodulin                                                      | Full Calmodulin [Alexandrium fundyense]                                                             | 1.10 <sup>-78</sup> |                                                                                                                           |                     | Cellular homeostasis            | HO112669 |
| TB-I-177 | Cytochrome c oxidase subunit I                                  | cytochrome c oxidase subunit I [Stylophora pistillata]                                              | 1.10 <sup>-46</sup> |                                                                                                                           |                     | Cellular metabolic process      | HO112671 |
| TB-I-178 | Ferritin                                                        | ferritin heavy chain polypeptide 1 [Branchiostoma lanceolatum]                                      | 1.10 <sup>-51</sup> |                                                                                                                           |                     | Immune response                 | HO112672 |
| TB-I-179 | Ferritin                                                        | ferritin [Boophilus microplus]                                                                      | 2.10 <sup>-13</sup> |                                                                                                                           |                     | Immune response                 | HO112673 |
| TB-I-181 | Similar to ARP5 actin-related protein 5                         | hypothetical protein BRAFLDRAFT_118261 [Branchiostoma floridae]                                     | 4.10 <sup>-38</sup> | PREDICTED: similar to ARP5 actin-related protein 5 homolog [Macaca mulatta]                                               | 9.10 <sup>-27</sup> | Chromatin remodelling           | HO112676 |
| TB-I-182 | Twinstar                                                        | predicted protein [Nematostella vectensis]                                                          | 3.10 <sup>-11</sup> | twinstar [Drosophila melanogaster]                                                                                        | 1.10 <sup>-6</sup>  | Cytoskeleton organization       | HO112677 |
| TB-I-183 | Fibrous sheath CABYR binding protein                            | hypothetical protein CLOBOL_07325 [Clostridium bolteae ATCC BAA-613]                                | 5.10 <sup>-13</sup> | fibrous sheath CABYR binding protein [Homo sapiens]                                                                       | 6.10 <sup>-9</sup>  | Protein metabolic process       | HO112678 |
| TB-I-184 | Similar to poly (ADP-ribose) polymerase                         | hypothetical protein NEMVEDRAFT_v1g141705 [Nematostella vectensis]                                  | 4.10 <sup>-13</sup> | PREDICTED: similar to poly (ADP-ribose) polymerase family, member 15 [Macaca mulatta]                                     | 5.10 <sup>-11</sup> | RNA metabolic process           | HO112679 |
| TB-I-185 | Similar to katanin p80                                          | hypothetical protein OsJ_16629 [Oryza sativa]                                                       | 2.10 <sup>-4</sup>  | PREDICTED: similar to katanin p80 (WD40-                                                                                  | 5.10 <sup>-4</sup>  | Cytoskeleton organization       | HO112680 |

|          |                                                              |                                                                                         |                     |                                                                                  |                     |                            |          |
|----------|--------------------------------------------------------------|-----------------------------------------------------------------------------------------|---------------------|----------------------------------------------------------------------------------|---------------------|----------------------------|----------|
|          |                                                              | Japonica Group]                                                                         |                     | containing) subunit B 1 [Apis mellifera]                                         |                     |                            |          |
| TB-I-186 | TLD domain containing protein                                | TLD domain containing protein [Plasmodium knowlesi strain H]                            | 5.10 <sup>-4</sup>  |                                                                                  |                     | System development         | HO112681 |
| TB-I-188 | Similar to Zinc finger RNA-binding protein                   | PREDICTED: similar to Zinc finger RNA-binding protein [Bos taurus]                      | 6.10 <sup>-8</sup>  |                                                                                  |                     | RNA metabolic process      | HO112683 |
| TB-I-192 | Putative isocitrate dehydrogenase NAD subunit beta           | predicted protein [Nematostella vectensis]                                              | 3.10 <sup>-14</sup> | isocitrate dehydrogenase NAD subunit beta, putative [Pediculus humanus corporis] | 3.10 <sup>-10</sup> | Cellular metabolic process | HO112688 |
| TB-I-193 | Major basic nuclear protein                                  | major basic nuclear protein [Karlodinium micrum]                                        | 1.10 <sup>-6</sup>  |                                                                                  |                     | Chromatin remodelling      | HO112689 |
| TB-I-194 | Major basic nuclear protein                                  | major basic nuclear protein [Karlodinium micrum]                                        | 3.10 <sup>-16</sup> |                                                                                  |                     | Chromatin remodelling      | HO112690 |
| TB-I-195 | Precursor of mutase superoxide dismutase [Fe/Mn]             | precursor of mutase superoxide dismutase [Fe/Mn] [Phaeodactylum tricorutum CCAP 1055/1] | 2.10 <sup>-25</sup> |                                                                                  |                     | Response to stress         | HO112691 |
| TB-I-196 | Putative netrin receptor unc5                                | netrin receptor unc5, putative [Schistosoma mansoni]                                    | 1.10 <sup>-3</sup>  |                                                                                  |                     | Apoptosis                  | HO112692 |
| TB-I-198 | Peridinin chlorophyll-a binding protein apoprotein precursor | peridinin chlorophyll-a binding protein apoprotein precursor [Symbiodinium kawagutii]   | 2.10 <sup>-23</sup> |                                                                                  |                     | Photosynthetic process     | HO112694 |
| TB-I-199 | Similar to Transmembrane protein 173                         | predicted protein [Nematostella vectensis]                                              | 7.10 <sup>-6</sup>  | similar to Transmembrane protein 173 [Danio rerio]                               | 8.10 <sup>-4</sup>  | Immune response            | HO112695 |
| TB-I-201 | CEBPB (CCAAT/Enhancer binding protein beta) protein          | predicted protein [Nematostella vectensis]                                              | 5.10 <sup>-14</sup> | CEBPB (CCAAT/Enhancer binding protein beta) protein [Homo sapiens]               | 4.10 <sup>-4</sup>  | Immune response            | HO112699 |
| TB-I-204 | Hairy A protein                                              | predicted protein [Nematostella vectensis]                                              | 1.10 <sup>-24</sup> | hairy A protein [Branchiostoma floridae]                                         | 1.10 <sup>-22</sup> | Signal transduction        | HO112702 |
| TB-I-205 | Concanavalin                                                 | predicted protein [Nematostella vectensis]                                              | 2.10 <sup>-45</sup> | thrombospondin N-terminal-like domain-containing protein [Synechococcus sp]      | 2.10 <sup>-4</sup>  | Immune response            | HO112703 |
| TB-I-206 | collagen, type II, alpha 1                                   | predicted protein [Nematostella vectensis]                                              | 1.10 <sup>-14</sup> | collagen, type II, alpha 1 [Xenopus laevis]                                      | 4.10 <sup>-9</sup>  | System development         | HO112704 |
| TB-I-207 | TRM1 tRNA methyltransferase                                  | predicted protein [Nematostella vectensis]                                              | 8.10 <sup>-42</sup> | TRM1 tRNA methyltransferase 1 homolog (S. cerevisiae) [Bos taurus]               | 1.10 <sup>-33</sup> | Protein metabolic process  | HO112705 |
| TB-I-208 | Similar to microfilament-associated protein 1                | predicted protein [Nematostella vectensis]                                              | 8.10 <sup>-18</sup> | PREDICTED: similar to microfilament-associated protein 1 [Tribolium castaneum]   |                     | Immune response            | HO112706 |
| TB-I-209 | 40S ribosomal protein S4                                     | predicted protein [Nematostella vectensis]                                              | 3.10 <sup>-42</sup> | 40S ribosomal protein S4 [Epinephelus coioides]                                  | 3.10 <sup>-25</sup> | Protein metabolic process  | HO112707 |
| TB-I-210 | Ribosomal protein L19                                        | predicted protein [Nematostella vectensis]                                              | 7.10 <sup>-33</sup> | ribosomal protein L19 [Suberites domuncula]                                      | 4.10 <sup>-30</sup> | Protein metabolic process  | HO112709 |
| TB-I-211 | Putative 40S ribosomal protein RPS30                         | predicted protein [Nematostella vectensis]                                              | 5.10 <sup>-26</sup> | putative 40S ribosomal protein RPS30 [Flustra foliacea]                          | 2.10 <sup>-24</sup> | Protein metabolic process  | HO112710 |
| TB-I-212 | Putative ribosomal protein L18                               | predicted protein [Nematostella vectensis]                                              | 1.10 <sup>-59</sup> | putative ribosomal protein L18 [Barentsia elongata]                              | 6.10 <sup>-59</sup> | Protein metabolic process  | HO112711 |
| TB-I-213 | Similar to ribosomal protein L35A isoform 2                  | predicted protein [Nematostella vectensis]                                              | 3.10 <sup>-47</sup> | PREDICTED: similar to ribosomal protein L35A isoform 2 [Hydra magnipapillata]    | 2.10 <sup>-42</sup> | Protein metabolic process  | HO112712 |
| TB-I-214 | Ribosomal protein S6                                         | predicted protein [Nematostella vectensis]                                              | 1.10 <sup>-10</sup> | ribosomal protein S6 [Aedes albopictus]                                          | 6.10 <sup>-7</sup>  | Protein metabolic process  | HO112713 |
| TB-I-215 | Argonaute 2                                                  | predicted protein [Nematostella vectensis]                                              | 1.10 <sup>-13</sup> | argonaute 2 [Oikopleura dioica]                                                  | 1.10 <sup>-12</sup> | Immune response            | HO112714 |
| TB-I-216 | Putative 60S ribosomal protein RPL13                         | predicted protein [Nematostella vectensis]                                              | 2.10 <sup>-18</sup> | putative 60S ribosomal protein RPL13 [Novocrania anomala]                        | 1.10 <sup>-16</sup> | Protein metabolic process  | HO112715 |

|          |                                                                |                                                                     |                     |                                                                                              |                     |                            |          |
|----------|----------------------------------------------------------------|---------------------------------------------------------------------|---------------------|----------------------------------------------------------------------------------------------|---------------------|----------------------------|----------|
| TB-I-217 | 40S ribosomal protein SA                                       | 40S ribosomal protein SA [Nematostella vectensis]                   | 7.10 <sup>-53</sup> |                                                                                              |                     | Protein metabolic process  | HO112716 |
| TB-I-218 | Similar to 60S ribosomal protein L28 isoform 1                 | predicted protein [Nematostella vectensis]                          | 3.10 <sup>-44</sup> | PREDICTED: similar to 60S ribosomal protein L28 isoform 1 [Ciona intestinalis]               | 3.10 <sup>-30</sup> | Protein metabolic process  | HO112717 |
| TB-I-219 | 60S ribosomal protein L13a                                     | predicted protein [Nematostella vectensis]                          | 3.10 <sup>-6</sup>  | 60S ribosomal protein L13a [Ornithoconus huwena]                                             | 3.10 <sup>-5</sup>  | Protein metabolic process  | HO112718 |
| TB-I-220 | Putative 60S ribosomal protein L38 isoform 1                   | predicted protein [Nematostella vectensis]                          | 9.10 <sup>-19</sup> | TPA: putative 60S ribosomal protein L38 isoform 1 [Spadella cephaloptera]                    | 3.10 <sup>-18</sup> | Protein metabolic process  | HO112720 |
| TB-I-221 | Similar to ribosomal protein S6                                | predicted protein [Nematostella vectensis]                          | 4.10 <sup>-28</sup> | similar to ribosomal protein S6 [Taeniopygia guttata]                                        | 2.10 <sup>-27</sup> | Protein metabolic process  | HO112721 |
| TB-I-222 | Transcript antisense to ribosomal RNA protein 1                | hypothetical protein NEMVEDRAFT_v1g1553 53 [Nematostella vectensis] | 4.10 <sup>-24</sup> | Transcript antisense to ribosomal RNA protein 1 [Saccharomyces cerevisiae]                   | 2.10 <sup>-10</sup> | Protein metabolic process  | HO112722 |
| TB-I-223 | Ribosomal protein 4                                            | ribosomal protein 4 [Lonomia obliqua]                               | 6.10 <sup>-15</sup> |                                                                                              |                     | Protein metabolic process  | HO112723 |
| TB-I-224 | Ribosomal protein L13a                                         | predicted protein [Nematostella vectensis]                          | 8.10 <sup>-23</sup> | ribosomal protein L13a [Suberites domuncula]                                                 | 3.10 <sup>-21</sup> | Protein metabolic process  | HO112724 |
| TB-I-225 | Similar to ribosomal protein L34                               | predicted protein [Nematostella vectensis]                          | 9.10 <sup>-11</sup> | PREDICTED: similar to ribosomal protein L34 [Hydra magnipapillata]                           | 8.10 <sup>-7</sup>  | Protein metabolic process  | HO112725 |
| TB-I-227 | Succinyl-CoA ligase beta subunit                               | succinyl-CoA ligase beta subunit [Arabidopsis thaliana]             | 6.10 <sup>-3</sup>  |                                                                                              |                     | Cellular metabolic process | HO112727 |
|          |                                                                |                                                                     |                     |                                                                                              |                     |                            |          |
| TB-R-149 | Acetyl coenzyme A-transferase                                  | acetyl coenzyme A-transferase [Artemia franciscana]                 | 2.10 <sup>-17</sup> |                                                                                              |                     | Cellular metabolic process | HO112868 |
| TB-R-151 | Calmodulin                                                     | calmodulin [Toxoplasma gondii ME49]                                 | 7.10 <sup>-70</sup> |                                                                                              |                     | Cellular homeostasis       | HO112871 |
| TB-R-153 | Pdcysteine-rich protein                                        | Pdcysteine-rich protein [Pocillopora damicornis]                    | 3.10 <sup>-25</sup> |                                                                                              |                     | System development         | HO112873 |
| TB-R-158 | RNase NGR3                                                     | hypothetical protein [Monosiga brevicollis MX1]                     | 4.10 <sup>-17</sup> | RNase NGR3 [Nicotiana glutinosa]                                                             | 4.10 <sup>-9</sup>  | Immune response            | HO112878 |
| TB-R-159 | Putative FERM, RhoGEF and pleckstrin domain-containing protein | predicted protein [Nematostella vectensis]                          | 2.10 <sup>-20</sup> | FERM, RhoGEF and pleckstrin domain-containing protein, putative [Pediculus humanus corporis] | 2.10 <sup>-10</sup> | Signal transduction        | HO112879 |
| TB-R-160 | Similar to 60S ribosomal protein L28 isoform 1                 | predicted protein [Nematostella vectensis]                          | 8.10 <sup>-33</sup> | PREDICTED: similar to 60S ribosomal protein L28 isoform 1 [Ciona intestinalis]               | 3.10 <sup>-23</sup> | Protein metabolic process  | HO112881 |
| TB-R-161 | Secreted signalling factor wnt-A                               | secreted signalling factor wnt-A [Nematostella vectensis]           | 1.10 <sup>-4</sup>  |                                                                                              |                     | Signal transduction        | HO112882 |
| TB-R-162 | Defender against cell death 1                                  | predicted protein [Nematostella vectensis]                          | 8.10 <sup>-18</sup> | defender against cell death 1 [Xenopus (Silurana) tropicalis]                                | 9.10 <sup>-18</sup> | Apoptosis                  | HO112883 |
| TB-R-163 | Similar to Collagen alpha-1(XI) chain precursor isoform 1      | predicted protein [Nematostella vectensis]                          | 5.10 <sup>-41</sup> | PREDICTED: similar to Collagen alpha-1(XI) chain precursor isoform 1 [Apis mellifera]        | 3.10 <sup>-21</sup> | System development         | HO112884 |
| TB-R-165 | Similar to selectin P                                          | hypothetical protein BRAFLDRAFT_108141 [Branchiostoma floridae]     | 4.10 <sup>-10</sup> | PREDICTED: similar to selectin P [Taeniopygia guttata]                                       | 3.10 <sup>-7</sup>  | Immune response            | HO112886 |
| TB-R-166 | Protein TAR1                                                   | predicted protein [Nematostella vectensis]                          | 8.10 <sup>-24</sup> | RecName: Full=Protein TAR1 [Saccharomyces cerevisiae S288c]                                  | 5.10 <sup>-10</sup> | RNA metabolic process      | HO112887 |
| TB-R-167 | Putative translation factor Sui1                               | translation factor Sui1, putative [Ixodes scapularis]               | 1.10 <sup>-4</sup>  |                                                                                              |                     | Protein metabolic process  | HO112888 |
| TB-R-169 | RNA-binding protein                                            | RNA-binding protein [Karlodinium micrum]                            | 6.10 <sup>-15</sup> |                                                                                              |                     | RNA metabolic process      | HO112890 |
| TB-R-170 | S30-ubiquitin-like                                             | S30-ubiquitin-like [Suberites domuncula]                            | 5.10 <sup>-10</sup> |                                                                                              |                     | Protein metabolic          | HO112892 |

|                                                                                                             |                                            |                                                                        |              |                                                 |              | process                         |          |
|-------------------------------------------------------------------------------------------------------------|--------------------------------------------|------------------------------------------------------------------------|--------------|-------------------------------------------------|--------------|---------------------------------|----------|
| TB-R-171                                                                                                    | Subunit of the signal recognition particle | subunit of the signal recognition particle [Chlamydomonas reinhardtii] | $9.10^{-3}$  |                                                 |              | Intracellular protein transport | HO112893 |
| TB-R-173                                                                                                    | Putative tubulin alpha chain               | tubulin alpha chain, putative [Schistosoma mansoni]                    | $1.10^{-3}$  |                                                 |              | Cytoskeleton organization       | HO112895 |
| TB-R-174                                                                                                    | Ubiquitin ligase 1                         | ubiquitin ligase 1 [Symbiodinium sp. C3]                               | $4.10^{-21}$ |                                                 |              | Protein metabolic process       | HO112896 |
| TB-R-188                                                                                                    | Ribosomal protein L23a                     | hypothetical protein BRAFLDRAFT_121811 [Branchiostoma floridae]        | $9.10^{-14}$ | ribosomal protein L23a [Branchiostoma belcheri] | $9.10^{-14}$ | Protein metabolic process       | HO112909 |
| BI, bacteria-induced; BR, bacteria-repressed; TBI, thermo-bacteria-induced; TBR, thermo-bacteria-repressed. |                                            |                                                                        |              |                                                 |              |                                 |          |
